# Supplementary material for: The conserved regulatory basis of mRNA contributions to the early Drosophila embryo differs between the maternal and zygotic genomes
Source: PubMed Central journal article supplement (PMC7145188; doi:10.1371/journal.pgen.1008645), 2020-03-30
Supplement: pgen.1008645.s001.pdf [file pgen.1008645.s001.pdf]

A

Motif Quality Distributions by Location in Dana

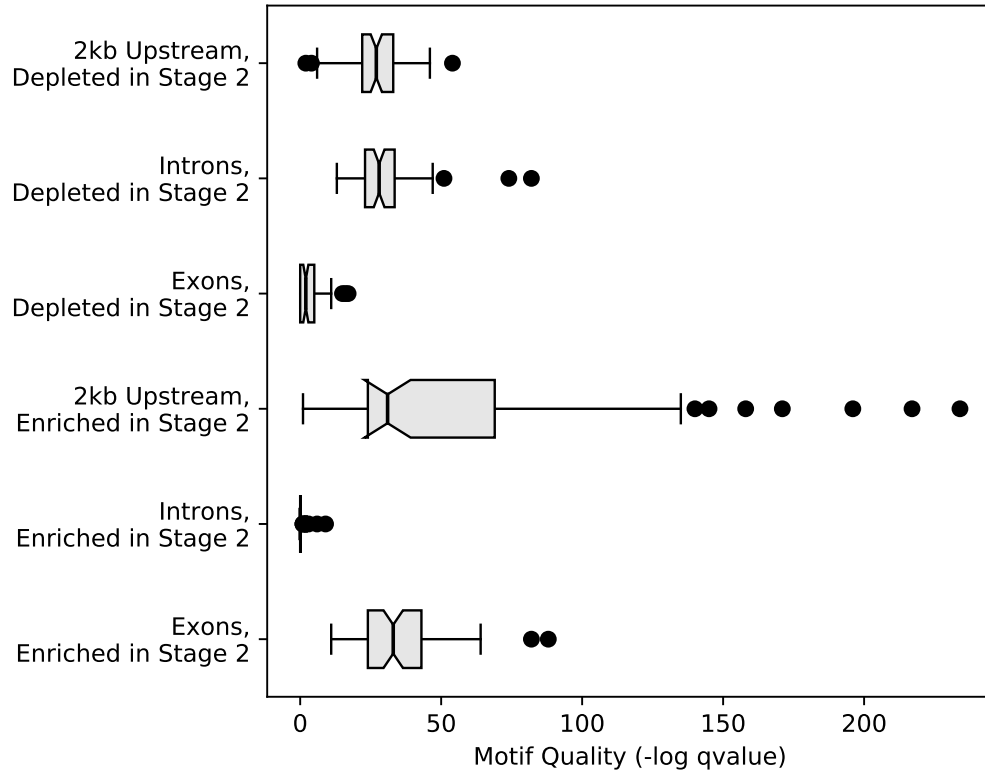

B

Motif Quality Distributions by Location in Dana

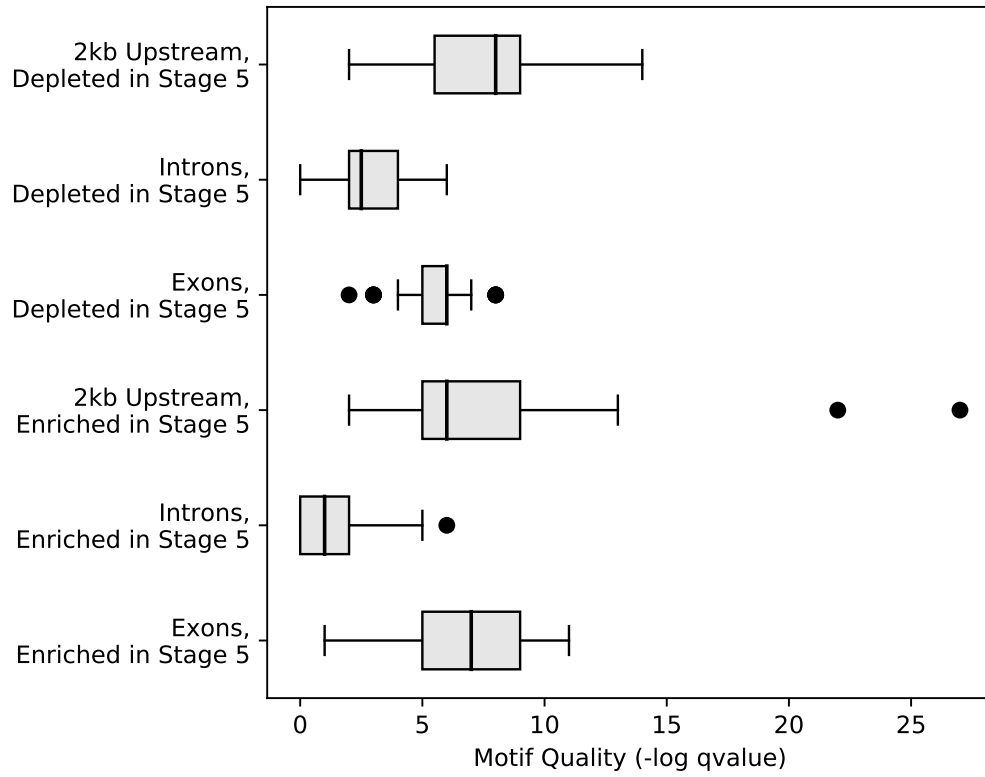

S1 Fig
