# Supplementary material for: The conserved regulatory basis of mRNA contributions to the early Drosophila embryo differs between the maternal and zygotic genomes
Source: PubMed Central journal article supplement (PMC7145188; doi:10.1371/journal.pgen.1008645), 2020-03-30
Supplement: pgen.1008645.s005.pdf [file pgen.1008645.s005.pdf]

A

| Logo                                                                              | GO term                               | Effect on Log-Odds of Expression | P-value |
|-----------------------------------------------------------------------------------|---------------------------------------|----------------------------------|---------|
|  | Establishment of Protein Localization | .141                             | .081    |
|  | Mitotic Cell Cycle                    | .058                             | .674    |
|  | Protein Transport                     | .011                             | .854    |
|  | Protein Transport                     | .190                             | .106    |
|  | RNA Processing                        | .269                             | .096    |

S5 Fig
