# Supplementary material for: The conserved regulatory basis of mRNA contributions to the early Drosophila embryo differs between the maternal and zygotic genomes
Source: PubMed Central journal article supplement (PMC7145188; doi:10.1371/journal.pgen.1008645), 2020-03-30
Supplement: pgen.1008645.s007.pdf [file pgen.1008645.s007.pdf]

| <b>Location</b> | <b>Motif</b> | <b>Best Match</b> | <b>Tomtom q-value</b> |
|-----------------|--------------|-------------------|-----------------------|
| Upstream        | AHTATCGATA   | Beaf-32           | 0.00809               |
| Upstream        | AHTATCGATA   | Dref              | 0.03381               |
| Upstream        | BGYGYGYGCG   | sr                | 0.01908               |
| Upstream        | BGYGYGYGCG   | klu               | 0.04051               |
| Upstream        | CGCTCDCNCK   | Trl               | 0.00634               |
| Upstream        | CGGCGCAGCG   | Mad               | 0.08778               |
| Upstream        | CGTCTCTCTC   | GAF               | 0.01615               |
| Upstream        | CGTCTCTCTC   | Trl               | 0.01615               |
| Upstream        | GAGAGAGAGA   | GAF               | 0.00001               |
| Upstream        | GAGAGAGAGA   | Trl               | 0.00001               |
| Upstream        | KCGCTCGCTC   | Trl               | 0.00059               |
| Upstream        | KCTACCTGYB   | Zld               | 0.00002               |
| Upstream        | NNNNTACCTG   | Zld               | 0.09762               |
| Upstream        | NNNNTACCTG   | vvl               | 0.09762               |
| Exon            | TACATACATA   | Top2              | 0.00277               |

**S1 Table**
